# Supplementary material for: Indigenous data governance approaches applied in research using routinely collected health data: a scoping review
Source: Springer Nature journal article supplement (doi:10.1038/s41746-024-01070-3), 2024-03-15
Supplement: 41746_2024_1070_MOESM1_ESM.pdf [file 41746_2024_1070_MOESM1_ESM.pdf]

**Supplementary Table 1 -  
PRISMA Checklist**

## Supplemental Material 1. Preferred Reporting Items for Systematic reviews and Meta-Analyses extension for Scoping Reviews (PRISMA-ScR) Checklist

| SECTION                                               | ITEM | PRISMA-ScR CHECKLIST ITEM                                                                                                                                                                                                                                                                                  | REPORTED ON PAGE #    |
|-------------------------------------------------------|------|------------------------------------------------------------------------------------------------------------------------------------------------------------------------------------------------------------------------------------------------------------------------------------------------------------|-----------------------|
| <b>TITLE</b>                                          |      |                                                                                                                                                                                                                                                                                                            |                       |
| Title                                                 | 1    | Identify the report as a scoping review.                                                                                                                                                                                                                                                                   | Page 1                |
| <b>ABSTRACT</b>                                       |      |                                                                                                                                                                                                                                                                                                            |                       |
| Structured summary                                    | 2    | Provide a structured summary that includes (as applicable): background, objectives, eligibility criteria, sources of evidence, charting methods, results, and conclusions that relate to the review questions and objectives.                                                                              | Page 3                |
| <b>INTRODUCTION</b>                                   |      |                                                                                                                                                                                                                                                                                                            |                       |
| Rationale                                             | 3    | Describe the rationale for the review in the context of what is already known. Explain why the review questions/objectives lend themselves to a scoping review approach.                                                                                                                                   | Page 4                |
| Objectives                                            | 4    | Provide an explicit statement of the questions and objectives being addressed with reference to their key elements (e.g., population or participants, concepts, and context) or other relevant key elements used to conceptualize the review questions and/or objectives.                                  | Page 5                |
| <b>METHODS</b>                                        |      |                                                                                                                                                                                                                                                                                                            |                       |
| Protocol and registration                             | 5    | Indicate whether a review protocol exists; state if and where it can be accessed (e.g., a Web address); and if available, provide registration information, including the registration number.                                                                                                             | N/A                   |
| Eligibility criteria                                  | 6    | Specify characteristics of the sources of evidence used as eligibility criteria (e.g., years considered, language, and publication status), and provide a rationale.                                                                                                                                       | Page 6                |
| Information sources*                                  | 7    | Describe all information sources in the search (e.g., databases with dates of coverage and contact with authors to identify additional sources), as well as the date the most recent search was executed.                                                                                                  | Page 5                |
| Search                                                | 8    | Present the full electronic search strategy for at least 1 database, including any limits used, such that it could be repeated.                                                                                                                                                                            | Supplementary Table 2 |
| Selection of sources of evidence†                     | 9    | State the process for selecting sources of evidence (i.e., screening and eligibility) included in the scoping review.                                                                                                                                                                                      | Page 6                |
| Data charting process‡                                | 10   | Describe the methods of charting data from the included sources of evidence (e.g., calibrated forms or forms that have been tested by the team before their use, and whether data charting was done independently or in duplicate) and any processes for obtaining and confirming data from investigators. | Page 7                |
| Data items                                            | 11   | List and define all variables for which data were sought and any assumptions and simplifications made.                                                                                                                                                                                                     | Page 6                |
| Critical appraisal of individual sources of evidence§ | 12   | If done, provide a rationale for conducting a critical appraisal of included sources of evidence; describe the methods used and how this information was used in any data synthesis (if appropriate).                                                                                                      | N/A                   |
| Synthesis of results                                  | 13   | Describe the methods of handling and summarizing the data that were charted.                                                                                                                                                                                                                               | N/A                   |

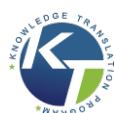

| SECTION                                       | ITEM | PRISMA-ScR CHECKLIST ITEM                                                                                                                                                                       | REPORTED ON PAGE # |
|-----------------------------------------------|------|-------------------------------------------------------------------------------------------------------------------------------------------------------------------------------------------------|--------------------|
| <b>RESULTS</b>                                |      |                                                                                                                                                                                                 |                    |
| Selection of sources of evidence              | 14   | Give numbers of sources of evidence screened, assessed for eligibility, and included in the review, with reasons for exclusions at each stage, ideally using a flow diagram.                    | Page 6, Figure 1   |
| Characteristics of sources of evidence        | 15   | For each source of evidence, present characteristics for which data were charted and provide the citations.                                                                                     | Page 6-7, Table 2  |
| Critical appraisal within sources of evidence | 16   | If done, present data on critical appraisal of included sources of evidence (see item 12).                                                                                                      | N/A                |
| Results of individual sources of evidence     | 17   | For each included source of evidence, present the relevant data that were charted that relate to the review questions and objectives.                                                           | Page 7 -13         |
| Synthesis of results                          | 18   | Summarize and/or present the charting results as they relate to the review questions and objectives.                                                                                            | Page 7 -13         |
| <b>DISCUSSION</b>                             |      |                                                                                                                                                                                                 |                    |
| Summary of evidence                           | 19   | Summarize the main results (including an overview of concepts, themes, and types of evidence available), link to the review questions and objectives, and consider the relevance to key groups. | Page 13-14         |
| Limitations                                   | 20   | Discuss the limitations of the scoping review process.                                                                                                                                          | Page 14            |
| Conclusions                                   | 21   | Provide a general interpretation of the results with respect to the review questions and objectives, as well as potential implications and/or next steps.                                       | Page 14            |
| <b>FUNDING</b>                                |      |                                                                                                                                                                                                 |                    |
| Funding                                       | 22   | Describe sources of funding for the included sources of evidence, as well as sources of funding for the scoping review. Describe the role of the funders of the scoping review.                 | Page 14            |

JB1 = Joanna Briggs Institute; PRISMA-ScR = Preferred Reporting Items for Systematic reviews and Meta-Analyses extension for Scoping Reviews.

\* Where *sources of evidence* (see second footnote) are compiled from, such as bibliographic databases, social media platforms, and Web sites.

† A more inclusive/heterogeneous term used to account for the different types of evidence or data sources (e.g., quantitative and/or qualitative research, expert opinion, and policy documents) that may be eligible in a scoping review as opposed to only studies. This is not to be confused with *information sources* (see first footnote).

‡ The frameworks by Arksey and O'Malley (6) and Levac and colleagues (7) and the JBI guidance (4, 5) refer to the process of data extraction in a scoping review as data charting.

§ The process of systematically examining research evidence to assess its validity, results, and relevance before using it to inform a decision. This term is used for items 12 and 19 instead of "risk of bias" (which is more applicable to systematic reviews of interventions) to include and acknowledge the various sources of evidence that may be used in a scoping review (e.g., quantitative and/or qualitative research, expert opinion, and policy document).

From: Tricco AC, Lillie E, Zarin W, O'Brien KK, Colquhoun H, Levac D, et al. PRISMA Extension for Scoping Reviews (PRISMA-ScR): Checklist and Explanation. *Ann Intern Med.* 2018;169:467–473. doi: [10.7326/M18-0850](https://doi.org/10.7326/M18-0850).

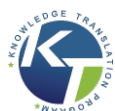

# **Supplementary Table 2 - Search Strategy**

| Database       | Search term                                                                                                                                                                                                                                                                                                                                                                                                                                                                                                                                                                                                                                                                                                                                                                                                                                                                                                                                                                                                                                                                                                                                                                                     | Date run | Total Results | Last 10 Years Results |
|----------------|-------------------------------------------------------------------------------------------------------------------------------------------------------------------------------------------------------------------------------------------------------------------------------------------------------------------------------------------------------------------------------------------------------------------------------------------------------------------------------------------------------------------------------------------------------------------------------------------------------------------------------------------------------------------------------------------------------------------------------------------------------------------------------------------------------------------------------------------------------------------------------------------------------------------------------------------------------------------------------------------------------------------------------------------------------------------------------------------------------------------------------------------------------------------------------------------------|----------|---------------|-----------------------|
| Medline OVID   | (exp *"Health Services, Indigenous"/ OR exp *"Indigenous Peoples"/ OR exp *"American Native Continental Ancestry Group"/ OR exp *"Native Hawaiian or Other Pacific Islander"/ OR exp *"United States Indian Health Service" OR indigenous*.ti. OR aborigin*.ti. OR "torres strait islander".ti. OR "first nation".ti. OR "first nations".ti. OR metis.ti. OR "alaska native".ti. OR "alaskan native".ti. OR "american indian".ti. OR maori*.ti. OR sami*.ti. OR saami*.ti. OR inuit*.ti. OR tribe*.ti. OR tribal*.ti. OR "native Hawaii".ti OR Cherokee.ti OR Navajo.ti)<br>AND<br>("data link".tw. OR "linked data".tw. OR "record link".tw. OR "linked record".tw. OR ((electronic*.tw. OR digital*.tw. OR computer*.tw.) ADJ2 (health record*.tw. OR medical record*.tw. OR patient record*.tw.)) OR exp "Medical Records Systems, Computerized"/ OR exp "Medical Record Linkage"/ OR exp "Routinely Collected Health Data"/ OR "Routinely Collected Health Data".tw. OR "administrative data".tw. OR "administrative health data".tw.)                                                                                                                                                      | 6-Dec-22 | 445           | 331                   |
| EMBASE         | ('indigenous people'/exp/mj OR 'canadian aboriginal'/exp/mj OR 'native hawaiian'/exp/mj OR 'oceanic ancestry group'/exp/mj OR 'Australian Aborigine'/exp/mj OR 'indigen*':ti OR aborigin*':ti OR 'torres strait island*':ti OR 'first nation*':ti OR 'first nations*':ti OR metis:ti OR 'alaskan native*':ti OR 'alaska native*':ti OR 'american indian*':ti OR 'maori*':ti OR 'sami*':ti OR 'saami*':ti OR inuit:ti OR Cherokee:ti OR Navajo:ti)<br>AND<br>('data linkage'/exp OR 'data link*':ab,ti,kw OR 'linked data':ab,ti,kw OR 'record link*':ab,ti,kw OR 'linked record*':ab,ti,kw OR 'electronic health record'/exp OR 'electronic medical record'/exp OR 'electronic medical record system'/exp OR 'electronic patient record'/exp OR ((electronic* OR digital* OR computer*) NEAR/2 ('health record*' OR 'medical record*' OR 'patient record*'))<br>OR 'administrative health data':ab,ti,kw OR 'administrative data':ab,ti,kw OR 'Routinely Collected Health Data ':ab,ti,kw OR 'administrative health data'/exp OR 'routinely collected health data'/exp)                                                                                                                         | 6-Dec-22 | 508           | 398                   |
| CINAHL         | ((MM "Health Services, Indigenous") OR (MM "Indigenous Peoples+") OR (MM "Indigenous Health") OR TI ('indigen*' OR aborigin* OR 'torres strait island*' OR 'first nation' OR 'first nations' OR metis OR 'alaskan native' OR 'alaska native' OR 'american indian' OR 'maori' OR 'sami' OR saami OR inuit OR Cherokee OR Navajo))<br>AND<br>((MH "Health and Disease") OR (MH "Health Services Administration") OR AB (health* OR mortal* OR morbid* OR hospi* OR medic*) OR TI (health* OR mortal* OR morbid* OR hospi* OR medic*))<br>AND<br>((MH "Routinely Collected Health Data") OR (MH "Clinical Data Repository") OR (MH "Electronic Health Records") OR (MH "Medical Records") OR (MH "Medical Record Linkage")<br>OR ((electronic* OR digital* OR computer* ) N2 ("health record*" OR "medical record*" OR "patient record*" )<br>OR AB ('administrative data' OR 'administrative health data' OR 'Routinely Collected Health Data' OR 'data link*' OR 'linked data' OR 'record link*' OR 'linked record*') OR TI ('administrative data' OR 'administrative health data' OR 'Routinely Collected Health Data' OR 'data link*' OR 'linked data' OR 'record link*' OR 'linked record*')) | 6-Dec-22 | 376           | 260                   |
| Web of Science | ((TI=("Indigenous Peoples" OR "Indigenous Canadians" OR "American Native" OR "Native Hawaiian" OR "Pacific Islander" OR "indigenous*" OR "aborigin*" OR "torres strait islander" OR "first nation" OR "first nations" OR "metis" OR "alaska native*" OR "alaskan native*" OR "american Indian" OR "maori*" OR "sami*" OR "saami*" OR "inuit*" OR "tribe*" OR "tribal*" OR "Cherokee" OR "Navajo")) OR (AK=("Indigenous Peoples" OR "Indigenous Canadians" OR "American Native" OR "Native Hawaiian" OR "Pacific Islander" OR "indigenous*" OR "aborigin*" OR "torres strait islander" OR "first nation"                                                                                                                                                                                                                                                                                                                                                                                                                                                                                                                                                                                         | 6-Dec-22 | 473           | 377                   |

|                                       |                                                                                                                                                                                                                                                                                                                                                                                                                                                                                                                                                                                                                                                                                                                                                                                                                                                                                                                                                                                                                                                                                                                                                                              |          |    |              |
|---------------------------------------|------------------------------------------------------------------------------------------------------------------------------------------------------------------------------------------------------------------------------------------------------------------------------------------------------------------------------------------------------------------------------------------------------------------------------------------------------------------------------------------------------------------------------------------------------------------------------------------------------------------------------------------------------------------------------------------------------------------------------------------------------------------------------------------------------------------------------------------------------------------------------------------------------------------------------------------------------------------------------------------------------------------------------------------------------------------------------------------------------------------------------------------------------------------------------|----------|----|--------------|
|                                       | <p>OR "first nations" OR "metis" OR "alaska native*" OR "alaskan native*" OR "american Indian" OR "maori*" OR "sami*" OR "saami*" OR "inuit*" OR "tribe*" OR "tribal*" OR "Cherokee" OR "Navajo")) OR (KP=("Indigenous Peoples" OR "Indigenous Canadians" OR "American Native" OR "Native Hawaiian" OR "Pacific Islander" OR "indigenous*" OR "aborigin*" OR "torres strait islander" OR "first nation" OR "first nations" OR "metis" OR "alaska native*" OR "alaskan native*" OR "american Indian" OR "maori*" OR "sami*" OR "saami*" OR "inuit*" OR "tribe*" OR "tribal*" OR "Cherokee" OR "Navajo"))</p> <p>AND</p> <p>(TS=("data link*" OR "linked data" OR ((electronic* OR digital* OR computer*) NEAR/2 ("health record*" OR "medical record*" OR "personal record*" OR "patient record*"))) OR "Medical Records Systems, Computerized" OR "Medical Record Linkage" OR "Routinely Collected Health Data" OR "administrative data" OR "administrative health data" OR "record link*" OR "linked record*")</p> <p>AND</p> <p>TS=("Health*" OR "mortal*" OR "morbid*" OR "hospi*" OR "medic*" OR "Diseas*" OR "sick*" OR "Psych*" or "surg*" OR "treat*" OR "care*")</p> |          |    |              |
| ATSIHealth                            | <p>(Title: "data link*" OR "linked data" OR ((electronic* OR digital* OR computer*) AND ("health record*" OR "medical record*" OR "personal record*" OR "patient record*"))) OR "Medical Records Systems, Computerized" OR "Medical Record Linkage" OR "Routinely Collected Health Data" OR "administrative data" OR "administrative health data" OR "record link*" OR "linked record*")</p> <p>OR</p> <p>(Abstract: "data link*" OR "linked data" OR ((electronic* OR digital* OR computer*) AND ("health record*" OR "medical record*" OR "personal record*" OR "patient record*"))) OR "Medical Records Systems, Computerized" OR "Medical Record Linkage" OR "Routinely Collected Health Data" OR "administrative data" OR "administrative health data" OR "record link*" OR "linked record*")</p>                                                                                                                                                                                                                                                                                                                                                                       | 6-Dec-22 | 39 | 23           |
| <b>Combined</b>                       |                                                                                                                                                                                                                                                                                                                                                                                                                                                                                                                                                                                                                                                                                                                                                                                                                                                                                                                                                                                                                                                                                                                                                                              |          |    | <b>1,012</b> |
| <b>Combined de-duped in EndNote</b>   |                                                                                                                                                                                                                                                                                                                                                                                                                                                                                                                                                                                                                                                                                                                                                                                                                                                                                                                                                                                                                                                                                                                                                                              |          |    | <b>662</b>   |
| <b>Combined de-duped in Covidence</b> |                                                                                                                                                                                                                                                                                                                                                                                                                                                                                                                                                                                                                                                                                                                                                                                                                                                                                                                                                                                                                                                                                                                                                                              |          |    | <b>580</b>   |

# **Supplementary Table 3 - Data Extraction**

| #  | Lead author surname | Year | Title                                                                                                                                                                                                   | Country       | Region study was conducted | Indigenous group/s                            | Gender | Outcome measured                   | Number of participants |
|----|---------------------|------|---------------------------------------------------------------------------------------------------------------------------------------------------------------------------------------------------------|---------------|----------------------------|-----------------------------------------------|--------|------------------------------------|------------------------|
| 1  | Zhao                | 2013 | The relationship between number of primary health care visits and hospitalisations: evidence from linked clinic and hospital data for remote Indigenous Australians                                     | Australia     | Rural                      | Aboriginal Australian; Torres Strait Islander | All    | Healthcare Utilisation and Access  | 52,739                 |
| 2  | West                | 2019 | Cause and incidence of injuries experienced by children in remote Cape York Indigenous communities                                                                                                      | Australia     | Rural                      | Aboriginal Australian; Torres Strait Islander | All    | Other Health Conditions            | 563                    |
| 3  | Tran-Duy            | 2020 | Development and Use of Prediction Models for Classification of Cardiovascular Risk of Remote Indigenous Australians                                                                                     | Australia     | Rural                      | Aboriginal Australian; Torres Strait Islander | All    | Chronic Diseases and Comorbidities | 1,583                  |
| 4  | Thompson            | 2022 | Using Health Check Data to Understand Risks for Dementia and Cognitive Impairment Among Torres Strait Islander and Aboriginal Peoples in Northern Queensland-A Data Linkage Study                       | Australia     | Rural                      | Aboriginal Australian; Torres Strait Islander | All    | Chronic Diseases and Comorbidities | 64                     |
| 5  | Taylor              | 2013 | Use of expedited partner therapy among chlamydia cases diagnosed at an urban Indian health centre, Arizona                                                                                              | United States | Urban                      | Alaska Native; American Indian                | All    | Healthcare Utilisation and Access  | 492                    |
| 6  | Takashima           | 2019 | Relative effectiveness of revaccination with 23-valent pneumococcal polysaccharide vaccine in preventing invasive pneumococcal disease in adult Aboriginal and Torres Strait Islander people, Australia | Australia     | Urban and Rural            | Aboriginal Australian; Torres Strait Islander | All    | Infectious Diseases                | 12,809                 |
| 7  | Su                  | 2020 | Impact of hearing impairment on early childhood development in Australian Aboriginal children: A data linkage study                                                                                     | Australia     | Rural                      | Aboriginal Australian                         | All    | Maternal and Child Health          | 1,037                  |
| 8  | Struck              | 2021 | An unconditional prenatal cash benefit is associated with improved birth and early childhood outcomes for Metis families in Manitoba, Canada                                                            | Canada        | Urban and Rural            | MÈtis                                         | Female | Maternal and Child Health          | 4,891                  |
| 9  | Stokes              | 2018 | Multimorbidity in Maori and Pacific patients: cross-sectional study in a Dunedin general practice                                                                                                       | New Zealand   | Urban                      | M?ori; Pacific Islander                       | All    | Chronic Diseases and Comorbidities | 232                    |
| 10 | Spaeth              | 2014 | Point-of-care testing for haemoglobin A1c in remote Australian Indigenous communities improves timeliness of diabetes care                                                                              | Australia     | Rural                      | Aboriginal Australian; Torres Strait Islander | All    | Healthcare Utilisation and Access  | 907                    |
| 11 | Smylie              | 2018 | Our health counts: population-based measures of urban Inuit health determinants, health status, and health care access                                                                                  | Canada        | Urban                      | Inuit                                         | All    | Healthcare Utilisation and Access  | 341                    |
| 12 | Singleton           | 2022 | Impact of a Prenatal Vitamin D Supplementation Program on Vitamin D Deficiency, Rickets and Early Childhood Caries in an Alaska Native Population                                                       | United States | Rural                      | Alaska Native                                 | All    | Maternal and Child Health          | 1,522                  |



|    |                 |      |                                                                                                                                                                                              |               |                 |                                               |     |                                    |        |
|----|-----------------|------|----------------------------------------------------------------------------------------------------------------------------------------------------------------------------------------------|---------------|-----------------|-----------------------------------------------|-----|------------------------------------|--------|
| 13 | Sinclair        | 2019 | The p.P479L variant in CPT1A is associated with infectious disease in a BC First Nation                                                                                                      | Canada        | Not described   | First Nations living in Canada                | All | Infectious Diseases                | 150    |
| 14 | Shmerling       | 2020 | The health needs of Aboriginal and Torres Strait Islander children in out-of-home care                                                                                                       | Australia     | Urban           | Aboriginal Australian; Torres Strait Islander | All | Maternal and Child Health          | 103    |
| 15 | Shaw            | 2022 | Validating a predictive algorithm for suicide risk with Alaska Native populations                                                                                                            | United States | Not described   | Alaska Native; American Indian                | All | Mental Health and Suicide Risk     | 10,864 |
| 16 | Schaefer        | 2019 | Differences in service utilization at an urban tribal health organization before and after Alzheimer's disease or related dementia diagnosis: A cohort study                                 | United States | Urban and Rural | Alaska Native; American Indian                | All | Healthcare Utilisation and Access  | 1,591  |
| 17 | Schaefer        | 2022 | Using the electronic health record to identify suicide risk factors in an Alaska Native Health System                                                                                        | United States | Urban and Rural | Alaska Native; American Indian                | All | Mental Health and Suicide Risk     | 1,483  |
| 18 | Ryan            | 2021 | COMPARING HEALTH OUTCOMES OF RURAL AND URBAN DIABETES PATIENTS: AN AUDIT OF A MŪORI HEALTH PROVIDER                                                                                          | New Zealand   | Urban and Rural | MŪori                                         | All | Healthcare Utilisation and Access  | 372    |
| 19 | Reilley         | 2018 | Assessing New Diagnoses of HIV Among American Indian/Alaska Natives Served by the Indian Health Service, 2005-2014                                                                           | United States | Rural           | Alaska Native; American Indian                | All | Infectious Diseases                | 2,273  |
| 20 | Ray             | 2020 | Health care utilisation changes among Alaska Native adults after participation in an indigenous community programme to address adverse life experiences: a propensity score-matched analysis | United States | Urban and Rural | Alaska Native; American Indian                | All | Healthcare Utilisation and Access  | 180    |
| 21 | Pev̄ta-Sv̄nchez | 2022 | Increasing Prevalence and Stable Incidence Rates of Inflammatory Bowel Disease Among First Nations: Population-Based Evidence From a Western Canadian Province                               | Canada        | Urban and Rural | First Nations living in Canada                | All | Chronic Diseases and Comorbidities | 140    |
| 22 | Muller          | 2017 | Text message reminders increased colorectal cancer screening in a randomized trial with Alaska Native and American Indian people                                                             | United States | Urban and Rural | Alaska Native; American Indian                | All | Healthcare Utilisation and Access  | 2,386  |
| 23 | Mitsch          | 2017 | HIV care and treatment of American Indians/Alaska natives with diagnosed HIV infection - 27 states and the District of Columbia, 2012                                                        | United States | Urban and Rural | Alaska Native; American Indian                | All | Healthcare Utilisation and Access  | 58     |
| 24 | Middleton       | 2021 | Temperature and place associations with Inuit mental health in the context of climate change                                                                                                 | Canada        | Rural           | Inuit                                         | All | Mental Health and Suicide Risk     | 5,373  |
| 25 | Mera            | 2020 | Evaluation of the Cherokee Nation Hepatitis C Virus Elimination Program in the First 22 Months of Implementation                                                                             | United States | Rural           | Alaska Native; American Indian                | All | Infectious Diseases                | 74,039 |
| 26 | Mera            | 2019 | Retrospective Study Demonstrating High Rates of Sustained Virologic Response after Treatment with Direct-Acting Antivirals among American Indian/Alaskan Natives                             | United States | Urban and Rural | Alaska Native; American Indian                | All | Infectious Diseases                | 280    |

|    |            |      |                                                                                                                                                                                                                                                                                                                                |               |                 |                                               |        |                                                                                              |        |
|----|------------|------|--------------------------------------------------------------------------------------------------------------------------------------------------------------------------------------------------------------------------------------------------------------------------------------------------------------------------------|---------------|-----------------|-----------------------------------------------|--------|----------------------------------------------------------------------------------------------|--------|
| 27 | Mendlowitz | 2021 | Healthcare costs associated with hepatitis C virus infection in the First Nations populations in Ontario...The Canadian Association for the Study of the Liver (CASL), the Canadian Network on Hepatitis C (CanHepC) and the Canadian Association of Hepatology Nurses (CAHN), Canadian Liver Meeting (Virtual), May 2-5, 2021 | Canada        | Urban and Rural | First Nations living in Canada                | All    | Infectious Diseases                                                                          | 6,012  |
| 28 | McInerney  | 2019 | Benefits of not smoking during pregnancy for Australian Aboriginal and Torres Strait Islander women and their babies: a retrospective cohort study using linked data                                                                                                                                                           | Australia     | Urban and Rural | Aboriginal Australian; Torres Strait Islander | All    | Maternal and Child Health                                                                    | 31,631 |
| 29 | Manifold   | 2019 | Complex diabetes screening guidelines for high-risk adolescent Aboriginal Australians: a barrier to implementation in primary health care                                                                                                                                                                                      | Australia     | Rural           | Aboriginal Australian; Torres Strait Islander | All    | Chronic Diseases and Comorbidities                                                           | 269    |
| 30 | Mamakwa    | 2017 | Evaluation of 6 remote First Nations community-based buprenorphine programs in northwestern Ontario: Retrospective study                                                                                                                                                                                                       | Canada        | Rural           | First Nations living in Canada                | All    | Other Health Conditions                                                                      | 526    |
| 31 | Lima       | 2019 | Trends in mental health related contacts among mothers of Aboriginal children in Western Australia (1990-2013): a linked data population-based cohort study of over 40 000 children                                                                                                                                            | Australia     | Urban and Rural | Aboriginal Australian                         | All    | Maternal and Child Health; Mental Health and Suicide Risk; Healthcare Utilisation and Access | 43,383 |
| 32 | Lillie     | 2021 | Buprenorphine/Naloxone for Opioid Use Disorder Among Alaska Native and American Indian People                                                                                                                                                                                                                                  | United States | Urban           | Alaska Native; American Indian                | All    | Other Health Conditions                                                                      | 240    |
| 33 | Li         | 2016 | High absolute risk of severe infections among Indigenous adults in rural northern Australia is amplified by diabetes - A 7 year follow up study                                                                                                                                                                                | Australia     | Rural           | Aboriginal Australian; Torres Strait Islander | All    | Public Health and Prevention                                                                 | 2,787  |
| 34 | Li         | 2015 | Smoking, poor nutrition, and sexually transmitted infections associated with pelvic inflammatory disease in remote North Queensland Indigenous communities, 1998-2005                                                                                                                                                          | Australia     | Rural           | Aboriginal Australian; Torres Strait Islander | Female | Infectious Diseases                                                                          | 1,445  |
| 35 | Leckning   | 2021 | Patterns of child protection service involvement by Aboriginal children associated with a higher risk of self-harm in adolescence: A retrospective population cohort study using linked administrative data                                                                                                                    | Australia     | Urban and Rural | Aboriginal Australian                         | All    | Mental Health and Suicide Risk                                                               | 6,476  |
| 36 | Le-Morawa  | 2022 | Effectiveness of a COVID-19 Vaccine Rollout in a Highly Affected American Indian Community, San Carlos Apache Tribe, December 2020-February 2021                                                                                                                                                                               | United States | Rural           | American Indian                               | All    | Public Health and Prevention                                                                 | 16,178 |

|    |                  |      |                                                                                                                                                                                                                                                                               |               |                 |                                               |     |                                                                   |        |
|----|------------------|------|-------------------------------------------------------------------------------------------------------------------------------------------------------------------------------------------------------------------------------------------------------------------------------|---------------|-----------------|-----------------------------------------------|-----|-------------------------------------------------------------------|--------|
| 37 | Lavoie           | 2018 | Hospitalization for mental health related ambulatory care sensitive conditions: what are the trends for First Nations in British Columbia?                                                                                                                                    | Canada        | Urban and Rural | First Nations living in Canada                | All | Mental Health and Suicide Risk; Healthcare Utilisation and Access | 96,808 |
| 38 | Lavoie           | 2022 | Kivalliq Inuit women travelling to Manitoba for birthing: findings from the Qanuinqitsiarutiksait study                                                                                                                                                                       | Canada        | Rural           | Inuit                                         | All | Healthcare Utilisation and Access                                 | 232    |
| 39 | Lasry            | 2016 | Traumatic brain injury in a rural indigenous population in Canada: a community-based approach to surveillance                                                                                                                                                                 | Canada        | Rural           | First Nations living in Canada                | All | Other Health Conditions                                           | 172    |
| 40 | Lakhan           | 2022 | Challenges of conducting kidney health checks among patients at risk of chronic kidney disease and attending an urban Aboriginal and Torres Strait Islander primary healthcare service                                                                                        | Australia     | Urban           | Aboriginal Australian; Torres Strait Islander | All | Chronic Diseases and Comorbidities                                | 1,181  |
| 41 | Khodra           | 2020 | Prevalence of Juvenile Idiopathic Arthritis in the Alaska Native Population                                                                                                                                                                                                   | United States | Urban and Rural | Alaska Native                                 | All | Maternal and Child Health                                         | 42     |
| 42 | Kelly            | 2019 | Prevalence of chronic kidney disease and cardiovascular comorbidities in adults in First Nations communities in northwest Ontario: a retrospective observational study                                                                                                        | Canada        | Rural           | First Nations living in Canada                | All | Chronic Diseases and Comorbidities                                | 16,170 |
| 43 | Keck             | 2014 | Influenza surveillance using electronic health records in the American Indian and Alaska Native population                                                                                                                                                                    | United States | Urban and Rural | Alaska Native; American Indian                | All | Public Health and Prevention                                      | 269    |
| 44 | Kearns           | 2013 | Clinic attendances during the first 12 months of life for Aboriginal children in five remote communities of northern Australia                                                                                                                                                | Australia     | Rural           | Aboriginal Australian                         | All | Healthcare Utilisation and Access                                 | 320    |
| 45 | Katzenellenbogen | 2015 | Strategic information for hospital service planning: a linked data study to inform an urban Aboriginal Health Liaison Officer program in Western Australia                                                                                                                    | Australia     | Urban           | Aboriginal Australian                         | All | Healthcare Utilisation and Access                                 | 5,113  |
| 46 | Hu               | 2019 | Does attending Work It Out ,Äi a chronic disease self-management program ,Äi affect the use of other health services by urban Aboriginal and Torres Strait Islander people with or at risk of chronic disease? A comparison between program participants and non-participants | Australia     | Urban           | Aboriginal Australian; Torres Strait Islander | All | Healthcare Utilisation and Access                                 | 815    |
| 47 | Hoy              | 2014 | Evidence for improved patient management through electronic patient records at a Central Australian Aboriginal Health Service                                                                                                                                                 | Australia     | Rural           | Aboriginal Australian                         | All | Chronic Diseases and Comorbidities                                | 1,251  |
| 48 | Howarth          | 2020 | Antibiotic use for Australian Aboriginal children in three remote Northern Territory communities                                                                                                                                                                              | Australia     | Rural           | Aboriginal Australian; Torres Strait Islander | All | Healthcare Utilisation and Access                                 | 124    |

|    |           |      |                                                                                                                                                                                                                                    |               |                 |                                               |        |                                    |        |
|----|-----------|------|------------------------------------------------------------------------------------------------------------------------------------------------------------------------------------------------------------------------------------|---------------|-----------------|-----------------------------------------------|--------|------------------------------------|--------|
| 49 | Hosking   | 2020 | Data linkage and computerised algorithmic coding to enhance individual clinical care for Aboriginal people living with chronic hepatitis B in the Northern Territory of Australia - Is it feasible?                                | Australia     | Rural           | Aboriginal Australian                         | All    | Infectious Diseases                | 19,314 |
| 50 | Hla       | 2020 | A "one stop liver shop" approach improves the cascade-of-care for Aboriginal and Torres Strait Islander Australians living with chronic hepatitis B in the Northern Territory of Australia: results of a novel care delivery model | Australia     | Rural           | Aboriginal Australian; Torres Strait Islander | All    | Infectious Diseases                | 83     |
| 51 | Hare      | 2022 | Prevalence and incidence of diabetes among Aboriginal people in remote communities of the Northern Territory, Australia: a retrospective, longitudinal data-linkage study                                                          | Australia     | Rural           | Aboriginal Australian                         | All    | Chronic Diseases and Comorbidities | 21,267 |
| 52 | Harasemiw | 2021 | Impact of point-of-care screening for hypertension, diabetes and progression of chronic kidney disease in rural Manitoba Indigenous communities                                                                                    | Canada        | Rural           | First Nations living in Canada                | All    | Chronic Diseases and Comorbidities | 1,353  |
| 53 | Gu        | 2013 | Gender differences in cardiovascular disease risk management for Pacific Islanders in primary care                                                                                                                                 | New Zealand   | Urban and Rural | Pacific Islander                              | All    | Chronic Diseases and Comorbidities | 10,863 |
| 54 | Griffiths | 2016 | Uptake of long-acting, reversible contraception in three remote aboriginal communities: A population-based study                                                                                                                   | Australia     | Rural           | Aboriginal Australian; Torres Strait Islander | Female | Maternal and Child Health          | 566    |
| 55 | Gordon    | 2015 | Acute rheumatic fever in first nations communities in northwestern Ontario: Social determinants of health "bite the heart"                                                                                                         | Canada        | Rural           | First Nations living in Canada                | All    | Chronic Diseases and Comorbidities | 8      |
| 56 | Goins     | 2019 | Depressive Symptoms and All-Cause Mortality in Older American Indians with Type 2 Diabetes Mellitus                                                                                                                                | United States | Rural           | American Indian                               | All    | Chronic Diseases and Comorbidities | 222    |
| 57 | Goins     | 2017 | Association of depressive symptomology and psychological trauma with diabetes control among older American Indian women: Does social support matter?                                                                               | United States | Rural           | American Indian                               | Female | Chronic Diseases and Comorbidities | 81     |
| 58 | Gibberd   | 2019 | Maternal fetal programming of birthweight among Australian Aboriginal infants: a population-based data linkage study                                                                                                               | Australia     | Not described   | Aboriginal Australian                         | All    | Maternal and Child Health          | 20,978 |
| 59 | Gardner   | 2016 | Picture of the health status of Aboriginal children living in an urban setting of Sydney                                                                                                                                           | Australia     | Urban           | Aboriginal Australian                         | All    | Public Health and Prevention       | 205    |
| 60 | Frejuk    | 2021 | Impact of a screen, triage and treat program for identifying chronic disease risk in Indigenous children                                                                                                                           | Canada        | Rural           | First Nations living in Canada                | All    | Healthcare Utilisation and Access  | 324    |
| 61 | Freeman   | 2018 | Can a child and family health service improve early childhood health outcomes in an urban Aboriginal community?                                                                                                                    | Australia     | Urban           | Aboriginal Australian                         | All    | Maternal and Child Health          | 639    |

|    |          |      |                                                                                                                                                                                                             |               |                 |                                               |        |                                   |         |
|----|----------|------|-------------------------------------------------------------------------------------------------------------------------------------------------------------------------------------------------------------|---------------|-----------------|-----------------------------------------------|--------|-----------------------------------|---------|
| 62 | Franz    | 2020 | Community-based outreach associated with increased health utilization among Navajo individuals living with diabetes: a matched cohort study                                                                 | United States | Rural           | American Indian                               | All    | Healthcare Utilisation and Access | 3,053   |
| 63 | Ferucci  | 2022 | Factors Associated with Telemedicine Use for Chronic Disease Specialty Care in the Alaska Tribal Health System, 2015-2019                                                                                   | United States | Not described   | Alaska Native                                 | All    | Healthcare Utilisation and Access | 3,075   |
| 64 | Ferucci  | 2022 | Health care utilization in Alaska Native people receiving chronic disease specialty care by videoconsultation compared to propensity-matched controls                                                       | United States | Rural           | Alaska Native                                 | All    | Healthcare Utilisation and Access | 3,075   |
| 65 | Enns     | 2021 | An unconditional prenatal income supplement is associated with improved birth and early childhood outcomes among First Nations children in Manitoba, Canada: a population-based cohort study                | Canada        | Urban and Rural | First Nations living in Canada                | Female | Maternal and Child Health         | 8,209   |
| 66 | Ehmann   | 2013 | Vogt-Koyanagi-Harada disease in First Nations and Metis of Northern Alberta                                                                                                                                 | Canada        | Rural           | First Nations living in Canada; MÈtis         | All    | Other Health Conditions           | 19      |
| 67 | Denise   | 2013 | Maternal-Infant Health Outcomes and Nursing Practice in a Remote First Nations Community in Northern Canada                                                                                                 | Canada        | Rural           | First Nations living in Canada                | All    | Maternal and Child Health         | 128     |
| 68 | Daws     | 2014 | Implementing a working together model for Aboriginal patients with acute coronary syndrome: an Aboriginal Hospital Liaison Officer and a specialist cardiac nurse working together to improve hospital care | Australia     | Urban           | Aboriginal Australian; Torres Strait Islander | All    | Healthcare Utilisation and Access | 15      |
| 69 | Davis    | 2013 | A threefold increase in gestational diabetes over two years: Review of screening practices and pregnancy outcomes in Indigenous women of Cape York, Australia                                               | Australia     | Rural           | Aboriginal Australian; Torres Strait Islander | Female | Maternal and Child Health         | 261     |
| 70 | Coughlin | 2013 | Pregnancy and Birth Outcome Improvements for American Indians in the Healthy Start Project of the Inter-Tribal Council of Michigan, 1998-2008                                                               | United States | Urban and Rural | American Indian                               | All    | Maternal and Child Health         | 4,149   |
| 71 | Clark    | 2022 | Trends in Inuit health services utilisation in Manitoba: findings from the Qanuingitsiarutiksait study                                                                                                      | Canada        | Urban and Rural | Inuit                                         | All    | Healthcare Utilisation and Access | 11,430  |
| 72 | Chi      | 2020 | Supply of care by dental therapists and emergency dental consultations in Alaska native communities in the Yukon-Kuskokwim delta: a mixed methods evaluation                                                | United States | Rural           | Alaska Native                                 | All    | Dental Health                     | 138,551 |
| 73 | Chi      | 2018 | Dental therapists linked to improved dental outcomes for Alaska Native communities in the Yukon-Kuskokwim Delta                                                                                             | United States | Rural           | Alaska Native                                 | All    | Dental Health                     | 28,191  |

|    |          |      |                                                                                                                                                                                        |               |                 |                                               |        |                                                           |        |
|----|----------|------|----------------------------------------------------------------------------------------------------------------------------------------------------------------------------------------|---------------|-----------------|-----------------------------------------------|--------|-----------------------------------------------------------|--------|
| 74 | Chan     | 2021 | Diabetes prevalence and complication rates: In individual First Nations communities in the Sioux Lookout region of Ontario                                                             | Canada        | Rural           | First Nations living in Canada                | All    | Chronic Diseases and Comorbidities                        | 18,542 |
| 75 | Carlin   | 2022 | Implementation of the 'Kimberley Mum's Mood Scale' across primary health care services in the Kimberley region of Western Australia: A mixed methods assessment                        | Australia     | Rural           | Aboriginal Australian                         | Female | Maternal and Child Health; Mental Health and Suicide Risk | 548    |
| 76 | Carlin   | 2022 | Exploring Mental Health Presentations in Remote Aboriginal Community Controlled Health Services in the Kimberley Region of Western Australia Using an Audit and File Reviews           | Australia     | Rural           | Aboriginal Australian                         | All    | Mental Health and Suicide Risk                            | 92     |
| 77 | Campbell | 2013 | Pre-pregnancy predictors of hypertension in pregnancy among Aboriginal and Torres Strait Islander women in north Queensland, Australia; a prospective cohort study                     | Australia     | Rural           | Aboriginal Australian; Torres Strait Islander | Female | Maternal and Child Health                                 | 961    |
| 78 | Campbell | 2019 | Childhood infection, antibiotic exposure and subsequent metabolic risk in adolescent and young adult Aboriginal Australians: practical implications                                    | Australia     | Rural           | Aboriginal Australian                         | All    | Other Health Conditions                                   | 343    |
| 79 | Campbell | 2022 | Health care cost of crusted scabies in Aboriginal communities in the Northern Territory, Australia                                                                                     | Australia     | Urban and Rural | Aboriginal Australian; Torres Strait Islander | All    | Public Health and Prevention                              | 42     |
| 80 | Bruden   | 2015 | Eighteen Years of Respiratory Syncytial Virus Surveillance: Changes in Seasonality and Hospitalization Rates in Southwestern Alaska Native Children                                    | United States | Rural           | Alaska Native                                 | All    | Infectious Diseases                                       | 5,966  |
| 81 | Bradley  | 2020 | Establishment of a sentinel surveillance network for sexually transmissible infections and blood borne viruses in Aboriginal primary care services across Australia: the ATLAS project | Australia     | Urban and Rural | Aboriginal Australian; Torres Strait Islander | All    | Public Health and Prevention                              | 29     |
| 82 | Bhat     | 2020 | Psychosocial disadvantage and residential remoteness is associated with Aboriginal women's mental health prior to childbirth                                                           | Australia     | Urban and Rural | Aboriginal Australian; Torres Strait Islander | Female | Maternal and Child Health                                 | 59,010 |
| 83 | Best     | 2017 | Genetic variants and risk of asthma in an American Indian population                                                                                                                   | United States | Rural           | American Indian                               | All    | Other Health Conditions                                   | 323    |
| 84 | Bar-Zeev | 2013 | Use of Maternal Health Services by Remote Dwelling Aboriginal Women in Northern Australia and Their Disease Burden                                                                     | Australia     | Rural           | Aboriginal Australian; Torres Strait Islander | Female | Healthcare Utilisation and Access                         | 412    |
| 85 | Askew    | 2019 | Knowing our patients: a cross-sectional study of adult patients attending an urban Aboriginal and Torres Strait Islander primary healthcare service                                    | Australia     | Urban           | Aboriginal Australian; Torres Strait Islander | All    | Healthcare Utilisation and Access                         | 400    |
